# Supplementary material for: Reaction Behavior of Porous TiAl3 Intermetallics Fabricated by Thermal Explosion with Different Particle Sizes
Source: MDPI journal article supplement (doi:10.3390/ma14237417), 2021-12-03
Supplement: s1 [file s1]

Supplementary Information

# Reaction Behavior of Porous $\text{TiAl}_3$ Intermetallics Fabricated by Thermal Explosion with Different Particle Sizes

Kaiyang Li, Tiance Zhang and Yuanzhi Zhu \*

Department of Materials Science and Engineering, School of Mechanical and Materials Engineering, North China University of Technology, 5 Jinyuanzhuang Road, Beijing 100144, China; tokaiyang@163.com (K.L.); toztc1@126.com (T.Z.)

\* Correspondence: tozyz1@126.com; Tel.: +86-18610088415

**Citation:** Li, K.; Zhang, T.; Zhu, Y. Reaction Behavior of Porous  $\text{TiAl}_3$  Intermetallics Fabricated by Thermal Explosion with Different Particle Sizes. *Materials* **2021**, *14*, 7417. <https://doi.org/10.3390/ma14237417>

Academic Editor: Filippo Berto  
Abilio M.P. De Jesus and José A.F.O. Correia

Received: 14 October 2021

Accepted: 27 November 2021

Published: 3 December 2021

**Publisher's Note:** MDPI stays neutral with regard to jurisdictional claims in published maps and institutional affiliations.

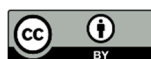

**Copyright:** © 2021 by the authors. Submitted for possible open access publication under the terms and conditions of the Creative Commons Attribution (CC BY) license (<http://creativecommons.org/licenses/by/4.0/>).

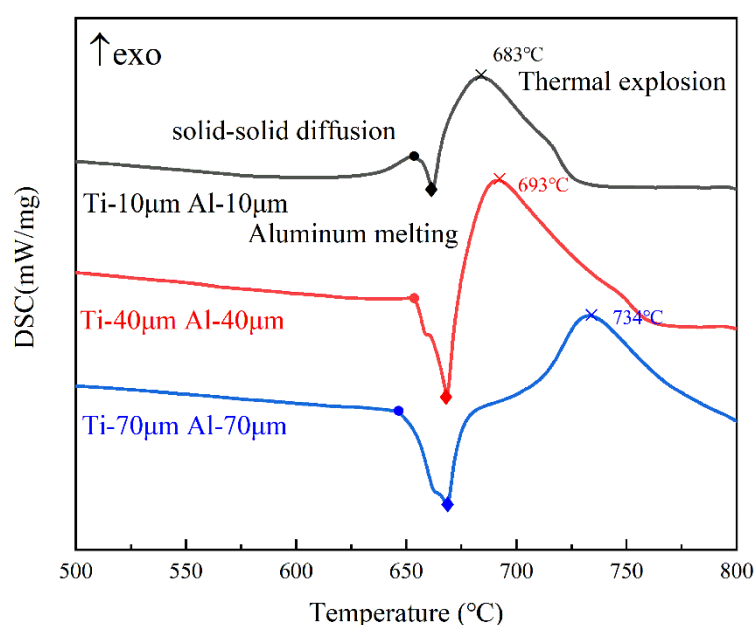

**Figure S1.** DSC results of both particles increased from 10 µm to 70 µm.
